# Supplementary material
Source: PubMed Central journal article supplement (PMC8201770)
Supplement: pnas.2022134118.sapp.pdf [file pnas.2022134118.sapp.pdf]

1 **Supplementary Materials for**

2 **Neural basis of opioid-induced respiratory depression and its rescue**

3 Shijia Liu<sup>1,2</sup>, Dongil Kim<sup>1</sup>, Tae Gyu Oh<sup>3</sup>, Gerald Pao<sup>4</sup>, Jonghyun Kim<sup>1</sup>, Richard D. Palmiter<sup>5</sup>,  
4 Matthew R. Banghart<sup>2</sup>, Kuo-Fen Lee<sup>1,2</sup>, Ronald M. Evans<sup>3</sup>, Sung Han<sup>1,2,\*</sup>

5 <sup>1</sup>Peptide Biology Laboratories, The Salk Institute for Biological Studies, La Jolla, CA 92037, USA.

6 <sup>2</sup> Section of Neurobiology, Division of Biological Sciences, University of California, San Diego, La  
7 Jolla, CA 92093, USA.

8 <sup>3</sup>Howard Hughes Medical Institute, Gene Expression Laboratories, The Salk Institute for Biological  
9 Studies, La Jolla, CA 92037, USA.

10 <sup>4</sup>Molecular and Cellular Biology Laboratories, The Salk Institute for Biological Studies, La Jolla, CA  
11 92037, USA.

12 <sup>5</sup>Howard Hughes Medical Institute, Department of Biochemistry, School of Medicine, University of  
13 Washington, Seattle, WA 98195, USA.

14 \*Corresponding author. Email: sunghan@salk.edu.

15

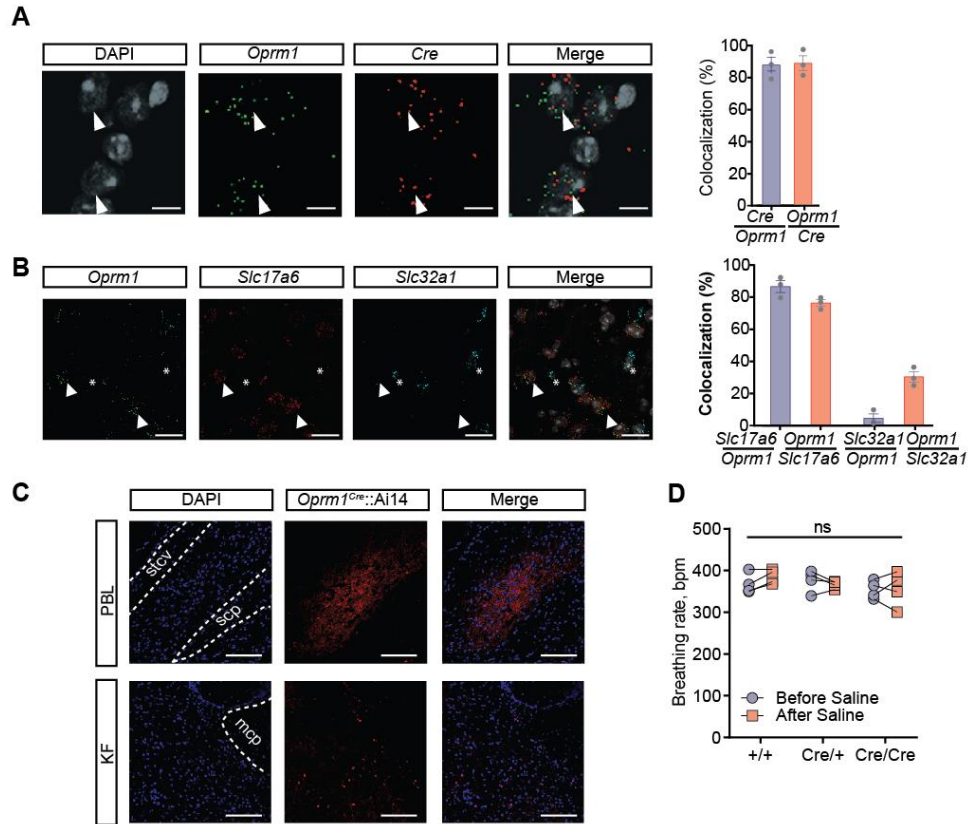

16

17 **Figure S1.** Characterization of the *Oprm1*<sup>Cre</sup> mouse line and PBL<sup>*Oprm1*</sup> neurons. (A) RNA *in situ*  
 18 hybridization and quantification of the colocalization for *Oprm1* and *Cre* mRNAs in the PBL of  
 19 *Oprm1*<sup>Cre/+</sup> mice (n = 902 cells from 3 animals). Arrowheads, double-labeled cells. Scale bar, 10  
 20  $\mu$ m. (B) RNA *in situ* hybridization and quantification of the colocalization for *Oprm1*, *Slc17a6*  
 21 (encoding VGLUT2), and *Slc32a1* (encoding VGAT) mRNAs in the PBL of wild type mice (n = 1552  
 22 and 1431 cells from 3 animals). Arrowheads, *Oprm1*<sup>+</sup>/*Slc17a6*<sup>+</sup> cells; asterisks, *Oprm1*<sup>-</sup>/*Slc32a1*<sup>+</sup>  
 23 cells. Scale bar, 50  $\mu$ m. (C) Example histology from *Oprm1*<sup>Cre::Ai14</sup> double transgenic mice  
 24 showing tdTomato expression in the PBL and KF under the same microscope settings. Anatomical  
 25 landmarks for PBL: stcv, ventral spinocerebellar tract; scp, superior cerebellar peduncle; mcp,  
 26 middle cerebellar peduncle. Scale bar, 200  $\mu$ m. (D) *Oprm1*<sup>Cre</sup> mice do not exhibit baseline breathing  
 27 differences compared to the wild type mice. Breathing rate before and after saline injection did not  
 28 display considerable differences across genotypes and within each genotype. Two-way ANOVA  
 29 with Bonferroni's multiple comparison post-hoc test. ns, not significant.

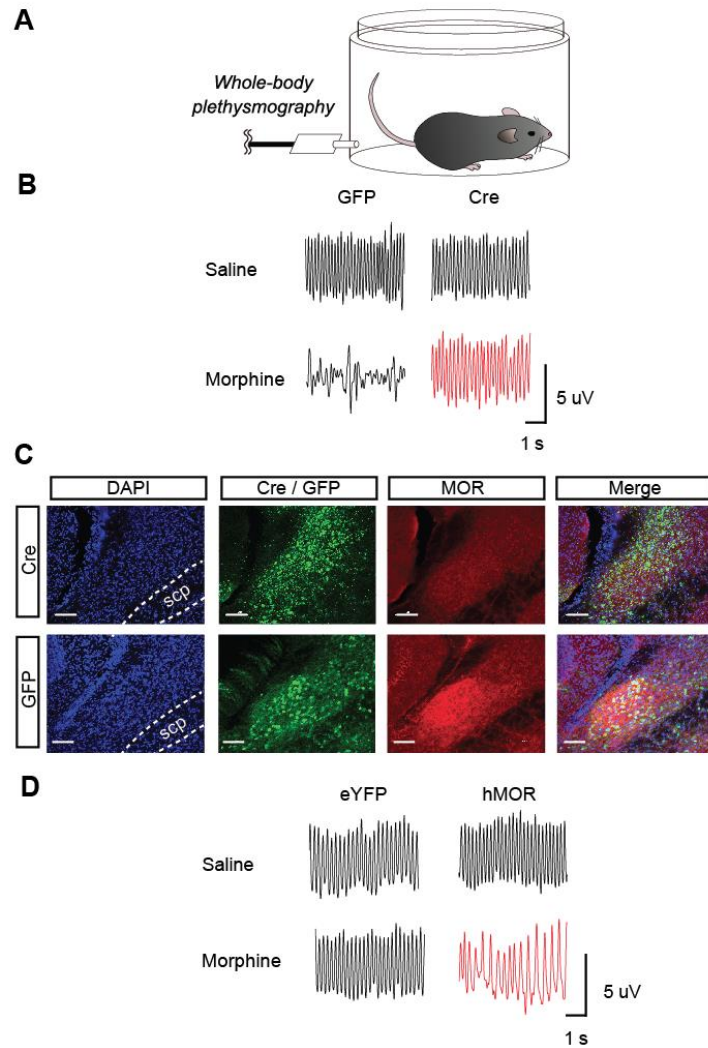

30

31 **Figure S2.** MOR signaling in the PBL is indispensable for OIRD. **(A)** Whole-body plethysmography  
 32 measured respiratory parameters before and after systemic injection of saline and morphine, after  
 33 conditional ablation **(B)** and rescue **(D)** of the MOR signaling in the PBL. **(B)** Example  
 34 plethysmograph after saline and morphine injections into the *Oprm1<sup>fl/fl</sup>* mice expressing AAV-GFP  
 35 and AAV-Cre-GFP in the PBL. **(C)** Confirmation of MOR deletion by MOR immunohistochemistry  
 36 after stereotaxic injection of AAV-Cre-GFP and control AAV-GFP into the PBL of the *Oprm1<sup>fl/fl</sup>* mice.  
 37 Scale bar, 100  $\mu$ m. **(D)** Example plethysmograph after saline and morphine injections into the  
 38 *Oprm1<sup>Cre/Cre</sup>* mice expressing AAV-DIO-eYFP and AAV-DIO-hMOR in the PBL.

39

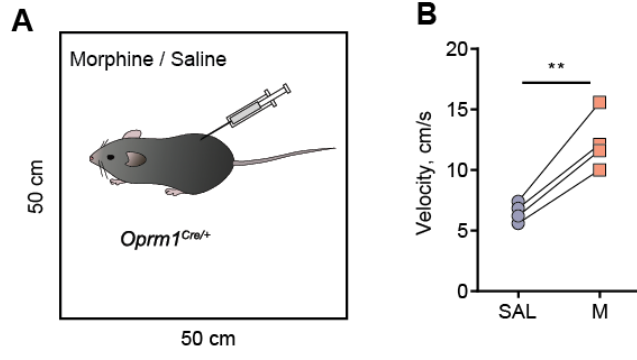

40

41 **Figure S3.** Morphine effect on locomotor activity. (A) Locomotor activity of *Oprm1<sup>Cre/+</sup>* mice after  
 42 morphine (40 mg/kg, i.p.) or saline injection was measured in the open field. (B) Systemic  
 43 morphine injection increased locomotor activity in *Oprm1<sup>Cre/+</sup>* mice. Paired t-test, \*\*,  $p < 0.01$ .

44

45

46

47

48

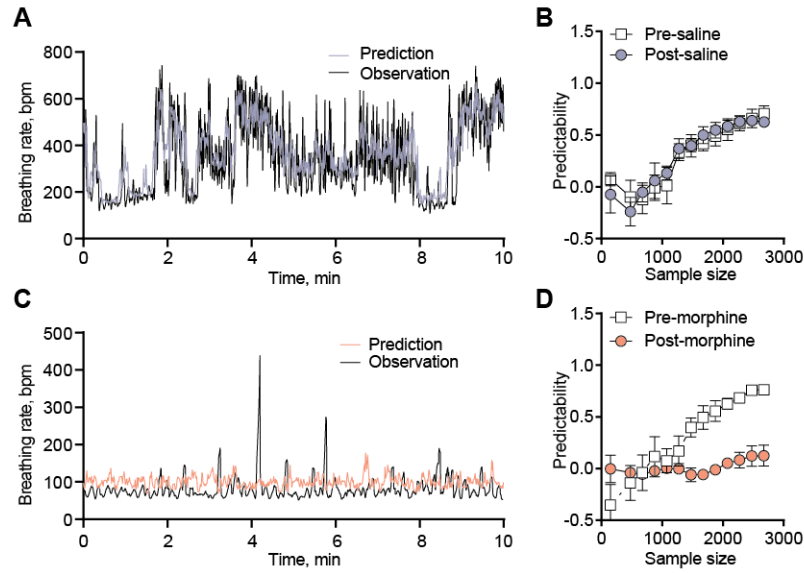

50

51 **Figure S4.** Morphine eliminated the breathing predictor. Convergent cross-mapping (CCM)  
 52 prediction of breathing rate using calcium activity as inputs before and after saline (0.9%, i.p., **A**  
 53 and **B**) and morphine (40 mg/kg, i.p., **C** and **D**) injection. (**A**) After saline injection, the predicted  
 54 and observed breathing rate traces followed closely with each other during the 10-min example.  
 55 (**B**) Model predictability increased with the sample size before and after saline injection ( $n = 4$ ). (**C**)  
 56 After morphine injection, the predicted and observed breathing rate traces no longer matched with  
 57 each other. (**D**) Model predictability increased with the sample size before morphine injection, but  
 58 the relationship was completely abolished after morphine injection ( $n = 4$ ).

59

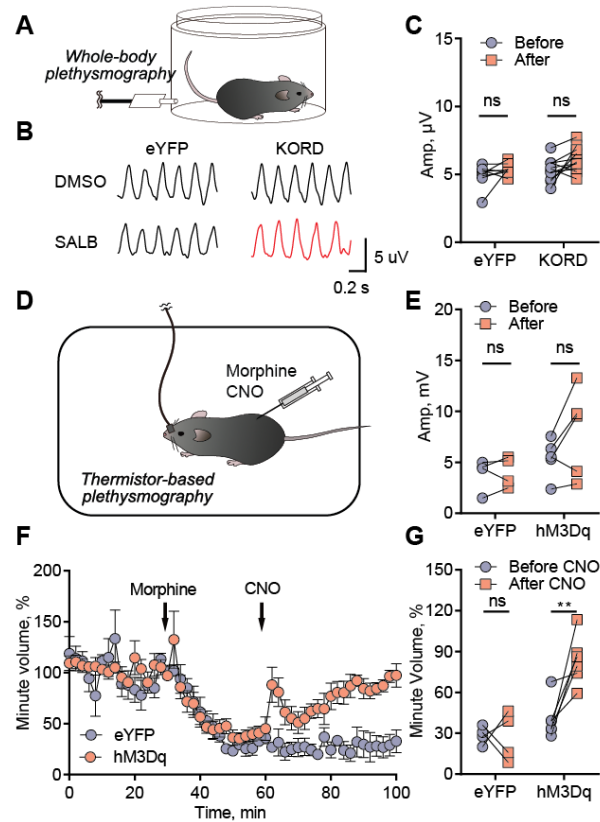

60

61 **Figure S5.** (A) Whole-body plethysmography was used to measure respiratory parameters before  
 62 and after systemic injection of DMSO and SALB in the *Oprm1<sup>Cre/Cre</sup>* mice expressing AAV-DIO-  
 63 eYFP and AAV-DIO-KORD in PBL<sup>*Oprm1*</sup> neurons. (B) Example plethysmograph after DMSO and  
 64 7.5 mg/kg SALB injections in eYFP and KORD groups. KORD-expressing animals displayed a  
 65 slower respiratory rate after SALB injection compared to other groups. (C) Respiratory amplitude  
 66 was not significantly changed before and after SALB injection, in both eYFP (n = 8) and KORD (n  
 67 = 11)-expressing animals. Two-way ANOVA with Bonferroni's multiple comparison post-hoc test,  
 68 ns, not significant. (D) Thermistor-based plethysmography was used for measuring respiration  
 69 before and after systemic injection of 40 mg/kg morphine and CNO in the *Oprm1<sup>Cre/+</sup>* mice  
 70 expressing AAV-DIO-eYFP and AAV-DIO-hM3Dq in PBL<sup>*Oprm1*</sup> neurons. (E) Respiratory amplitude  
 71 was not significantly changed before and after CNO injection, in both eYFP (n = 5) and hM3Dq-  
 72 expressing animals (n = 6). Although there was a trend of increase in the hM3Dq group, it failed to  
 73 reach statistical significance. Two-way ANOVA with Bonferroni's multiple comparison post-hoc  
 74 tests, ns, not significant. (F) Activation of PBL<sup>*Oprm1*</sup> neurons by injecting CNO (5 mg/kg, i.p.) in the  
 75 hM3Dq-expressing group (n = 6) completely rescued the minute volume to baseline level after  
 76 morphine-induced respiratory depression, but not in eYFP-expressing group (n = 4). (G)  
 77 Quantitative analysis of F showing CNO injection significantly increased the minute volume in the  
 78 hM3Dq-expressing group (n = 6), whereas failed to rescue in the eYFP-expressing group (n = 4).  
 79 Two-way ANOVA with Bonferroni's multiple comparison post-hoc test. \*\*,  $p < 0.01$ .

80

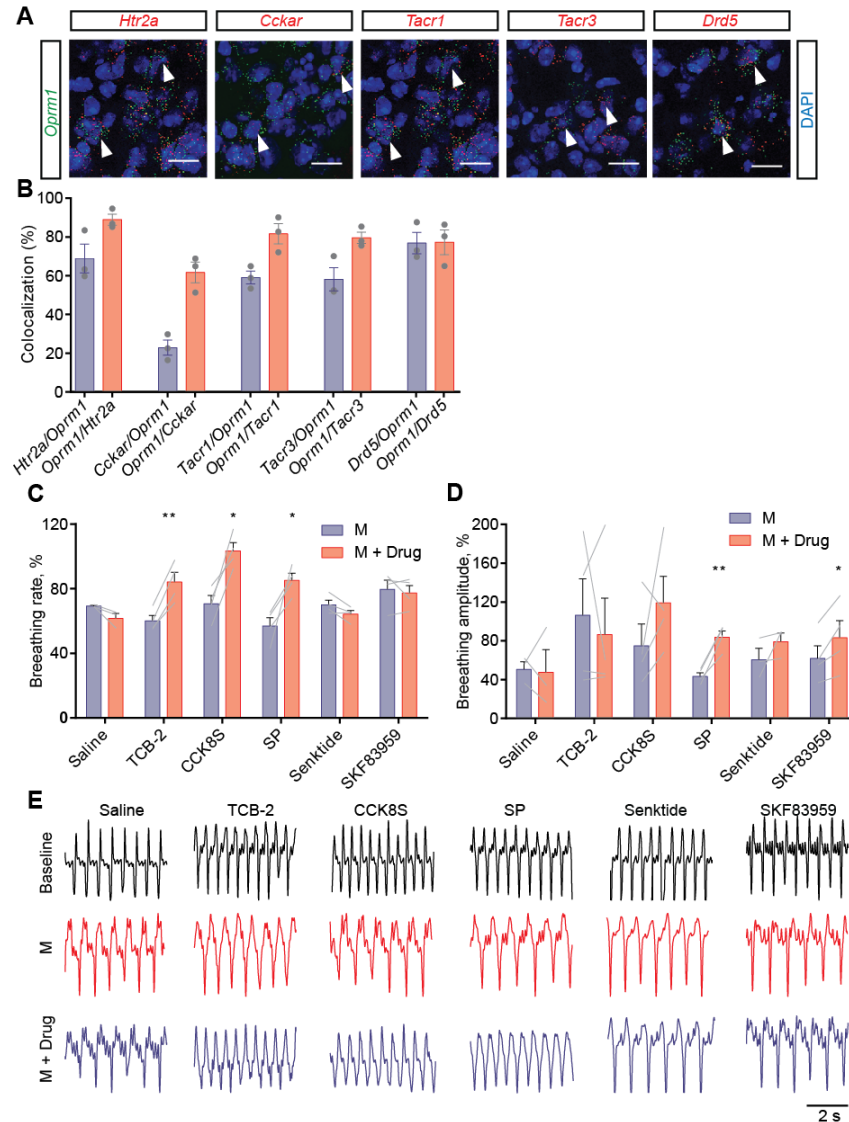

81

82 **Figure S6.** Rescuing of OIRD by activating endogenous GPCRs expressed on PBL *Oprm1* neurons.  
 83 (A) RNA *in situ* hybridization confirms the co-expression of mRNA of *Oprm1* and five selected  
 84 GPCRs, *Htr2a*, *Cckar*, *Tacr1*, *Tacr3*, and *Drd5*, in the wild type mice. Arrowheads, double-labeled  
 85 cells. Scale bar, 50  $\mu$ m. (B) Quantification of RNA *in situ* hybridization showing the colocalization  
 86 of *Oprm1* and selective GPCR genes in the PBL of wild type mice (770, 539, 836, 657, 431 cells  
 87 for *Htr2a*, *Cckar*, *Tacr1*, *Tacr3*, and *Drd5*, respectively). (C-D) Normalized breathing rate (C) and  
 88 amplitude (D) before morphine injection (Baseline), 30 minutes after morphine injection (80 mg/kg,  
 89 s.c., M), and 30 minutes after drug injection into the PBL (M + Drug), for all six drugs tested. Large  
 90 variations in amplitude are due to the technical limitations of the piezoelectric sensor since its  
 91 location is subjective to the slight movements of the animal's body. Paired t-test, \*,  $p < 0.05$ ; \*\*,  $p$   
 92  $< 0.01$ . e Example plethysmograph showing the breathing rhythm changes at each stage of the  
 93 experiment. Note the decreased breathing rate after morphine injection and increased breathing  
 94 rate after TCB-2, CCK8S, and SP injections. The exact shape of the plethysmograph varies due to  
 95 the placement of the piezoelectric sensor.

96

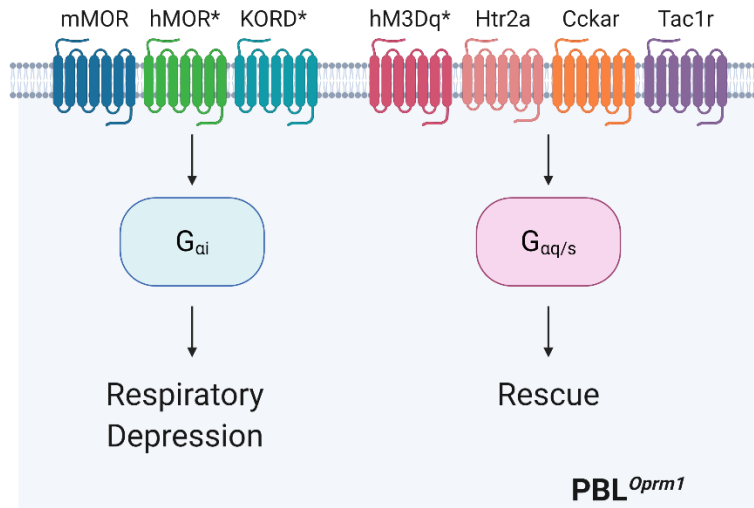

97

98 **Figure S7.** Summary of the current study. *PBL<sup>Oprm1</sup>* neurons are critical players in OIRD  
 99 pathogenesis and promising therapeutic targets for treating OIRD. In intact mice, inhibition of  
 100 *PBL<sup>Oprm1</sup>* neurons through  $G_i$ -coupled GPCRs via endogenous MOR (mMOR), human MOR  
 101 (hMOR), and KOR-derived DREADD (KORD) leads to respiratory depression. In contrast,  
 102 activation of these neurons via artificial (hM3Dq) or endogenous  $G_{q/s}$ -coupled GPCRs (Htr2a,  
 103 Cckar, Tac1r) rescues OIRD. Artificial GPCRs are marked with asterisks. Created with  
 104 BioRender.com.

105

106

107

108

109

110

111

112

113

114

115

116

117



**Supplementary Table 1. List of pharmacological agents used in the current study.**

| Drug Name                         | Receptor (Gene)                     | Receptor Family | Concentration                                                                                                                                          | Solvent                         | Company               |
|-----------------------------------|-------------------------------------|-----------------|--------------------------------------------------------------------------------------------------------------------------------------------------------|---------------------------------|-----------------------|
| Naloxone                          | MOR ( <i>Oprm1</i> )                | Gi              | 0.4 mg/mL (i.c., intracranial)                                                                                                                         | 0.9% saline                     | Somerset Therapeutics |
| Morphine                          | MOR ( <i>Oprm1</i> )                | Gi              | 80 mg/kg (s.c., for anesthesia experiments);<br>10 mg/kg (i.p., for PBL-specific <i>Oprm1</i> knockout);<br>40 mg/kg (i.p., for all other experiments) | 0.9% saline                     | Spectrum Chemical     |
| Salvinorin B (SALB)               | KORD                                | Gi              | 7.5 mg/kg (i.p.)                                                                                                                                       | 0.9% saline containing 10% DMSO | Cayman Chemical       |
| Clozapine-N-oxide (CNO)           | hM3Dq                               | Gq              | 5 mg/kg (i.p.)                                                                                                                                         | 0.9% saline                     | Cayman Chemical       |
| TCB-2                             | 5-HT <sub>2A</sub> ( <i>Htr2a</i> ) | Gq              | 1 mg/mL (i.c.)                                                                                                                                         | 0.9% saline                     | Tocris Bioscience     |
| CCK Octapeptide, sulfated (CCK8S) | CCK <sub>1</sub> R ( <i>Cckar</i> ) | Gq              | 1 mg/mL (i.c.)                                                                                                                                         | 0.9% saline                     | Abcam                 |
| Substance P                       | NK <sub>1</sub> R ( <i>Tacr1</i> )  | Gq, Gs          | 1 mg/mL (i.c.)                                                                                                                                         | 0.9% saline                     | Cayman Chemical       |
| Senktide                          | NK <sub>3</sub> R ( <i>Tacr3</i> )  | Gq              | 1 mg/mL (i.c.)                                                                                                                                         | 0.9% saline                     | Cayman Chemical       |
| SKF-83959                         | D <sub>5</sub> R ( <i>Drd5</i> )    | Gs              | 1 mg/mL (i.c.)                                                                                                                                         | 0.9% saline containing 5% DMSO  | Tocris Bioscience     |

**Supplementary Table 2. Key Resources Table**

| Type          | Designation                                               | Source or reference                | Identifiers      |
|---------------|-----------------------------------------------------------|------------------------------------|------------------|
| Mouse strains | Oprm1-Cre:GFP                                             | Laboratory of Dr. Richard Palmiter | N/A              |
|               | Wild type C57BL/6J                                        | Jackson Laboratory                 | Stock No. 000664 |
|               | RiboTag <i>Rpl22<sup>HA/HA</sup></i>                      | Jackson Laboratory                 | Stock No. 011029 |
|               | Ai14 <i>Gt(ROSA)26Sor<sup>tm14(CAG-tdTomato)Hze</sup></i> | Jackson Laboratory                 | Stock No. 007914 |
| Virus         | AAVDJ-CAG-Cre-GFP                                         | Salk Institute Viral Vector Core   | N/A              |
|               | AAVDJ-CAG-GFP                                             | Salk Institute Viral Vector Core   | N/A              |
|               | AAV-hSyn-DIO-mCherry-T2A-FLAG-hOprm1                      | Laboratory of Dr. Matthew Banghart | N/A              |
|               | AAV1-syn-FLEX-jGCaMP7s-WPRE                               | Addgene                            | Addgene# 104491  |
|               | AAVDJ-EF1a-DIO-hM3D(Gq)-mCherry                           | Salk Institute Viral Vector Core   | Addgene# 50460   |
|               | AAV-DIO-KORD-mCitrine                                     | Laboratory of Dr. Richard Palmiter | N/A              |
|               | AAV1-DIO-eYFP                                             | Laboratory of Dr. Richard Palmiter | N/A              |
| Antibodies    | Anti-hemagglutinin1.1, mouse (1:1000)                     | BioLegend                          | RRID AB_2565335  |

|                    |                                                                    |                                        |                        |
|--------------------|--------------------------------------------------------------------|----------------------------------------|------------------------|
|                    | Anti-GFP, chicken (1:1000)                                         | Aves Labs                              | RRID<br>AB_230731<br>3 |
|                    | Anti-MOR, rabbit (1:1000)                                          | ImmunoStar                             | RRID<br>AB_572251      |
|                    | Alexa Fluor® 647-conjugated<br>Donkey Anti-Mouse IgG<br>(1:1000)   | Jackson ImmunoResearch<br>Laboratories | RRID<br>AB_234086<br>3 |
|                    | Alexa Fluor® 488-conjugated<br>Donkey Anti-Chicken IgY<br>(1:1000) | Jackson ImmunoResearch<br>Laboratories | RRID<br>AB_234037<br>5 |
|                    | Alexa Fluor® 647-conjugated<br>Donkey Anti-Rabbit IgG<br>(1:1000)  | Jackson ImmunoResearch<br>Laboratories | RRID<br>AB_249228<br>8 |
| RNAscope<br>probes | Oprm1                                                              | Advanced Cell Diagnostics              | 315841                 |
|                    | Htr2a                                                              | Advanced Cell Diagnostics              | 401291                 |
|                    | Cckar                                                              | Advanced Cell Diagnostics              | 313751                 |
|                    | Drd5                                                               | Advanced Cell Diagnostics              | 494411                 |
|                    | Tacr3                                                              | Advanced Cell Diagnostics              | 481671                 |
|                    | Tacr1                                                              | Advanced Cell Diagnostics              | 428781                 |
|                    | Cre                                                                | Advanced Cell Diagnostics              | 402551                 |
|                    | Slc17a6                                                            | Advanced Cell Diagnostics              | 319171                 |
|                    | Slc32a1                                                            | Advanced Cell Diagnostics              | 319191                 |
| Chemicals          | FluoSpheres 540/560 (10%<br>v/v)                                   | Thermo Fisher                          | Cat# F8809             |

|          |                             |                                                                                                           |                  |
|----------|-----------------------------|-----------------------------------------------------------------------------------------------------------|------------------|
|          | Cholera Toxin Subunit B-555 | Invitrogen                                                                                                | Cat# C34776      |
|          | Naloxone                    | Somerset Therapeutics                                                                                     | Cat# 70069007110 |
|          | Morphine                    | Spectrum Chemical                                                                                         | Cat# M1167       |
|          | TCB-2                       | Tocris Bioscience                                                                                         | Cat# 2592        |
|          | CCK Octapeptide, sulfated   | Abcam                                                                                                     | Cat# ab120209    |
|          | Substance P                 | Cayman Chemical                                                                                           | Cat# 24035       |
|          | Senktide                    | Cayman Chemical                                                                                           | Cat# 16721       |
|          | SKF-83959                   | Tocris Bioscience                                                                                         | Cat# 2074        |
|          | Clozapine N-oxide           | Cayman Chemical                                                                                           | Cat# 16882       |
|          | Salvinorin B                | Cayman Chemical                                                                                           | Cat# 11488       |
|          | 2-methylbutane              | Fisher Chemical                                                                                           | Cat# O35514      |
| Software | Doric Neuroscience Studio   | Doric Lenses                                                                                              | N/A              |
|          | RStudio                     | RStudio                                                                                                   | Version 1.2.5001 |
|          | rEDM                        | <a href="https://cran.r-project.org/web/packages/rEDM/">https://cran.r-project.org/web/packages/rEDM/</a> | Version 0.7.2    |
|          | rEDM                        | <a href="https://ha0ye.github.io/rEDM/">https://ha0ye.github.io/rEDM/</a>                                 | Version 0.7.4    |
|          | LabChart                    | ADInstruments                                                                                             | Version 8        |
|          | BZ-X viewer                 | Keyence                                                                                                   | N/A              |
|          | OlyVIA                      | Olympus Life Science                                                                                      | N/A              |
|          | PRISM                       | GraphPad Software                                                                                         | Version 6        |

|  |             |       |                           |
|--|-------------|-------|---------------------------|
|  | Illustrator | Adobe | Version CS6<br>and CC2018 |
|--|-------------|-------|---------------------------|

121

122
